# Supplementary material for: Thermostable and nonflammable silica–polyetherimide–polyurethane nanofibrous separators for high power lithium ion batteries
Source: Royal Society of Chemistry journal article supplement (doi:10.1039/c5ta00856e), 2015-01-01
Supplement: c5ta00856e1.pdf [file c5ta00856e1.pdf]

## **Electronic supplement information (ESI)**

# **Thermostable and nonflammable silica-polyetherimide-polyurethane nanofibrous separators for high power lithium ion batteries**

Yunyun Zhai,<sup>ab</sup> Ke Xiao,<sup>a</sup> Jianyong Yu,<sup>c</sup> Jianmao Yang,<sup>d</sup> and Bin Ding<sup>\*ac</sup>

<sup>a</sup> State Key Laboratory for Modification of Chemical Fibers and Polymer Materials, College of Materials Science and Engineering, Donghua University, Shanghai 201620, China. E-mail: binding@dhu.edu.cn (B. Ding)

<sup>b</sup> College of Biological, Chemical Sciences and Engineering, Jiaxing University, Jiaxing 314001, China

<sup>c</sup> Key Laboratory of Textile Science & Technology, Ministry of Education, College of Textiles, Donghua University, Shanghai 201620, China

<sup>d</sup> Research Center for Analysis and Measurement, Donghua University, Shanghai 201620, China

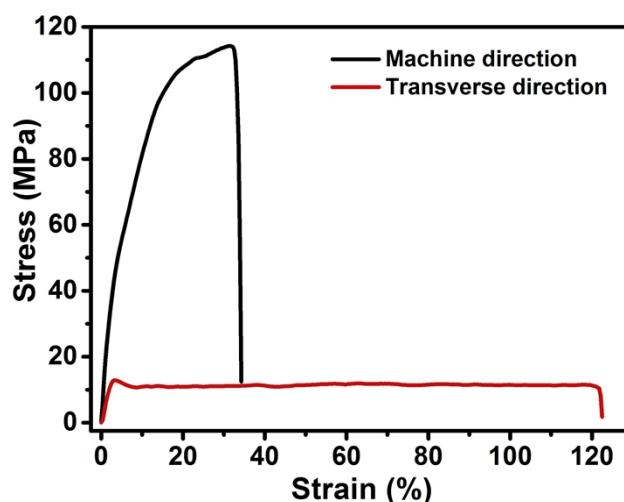

**Fig. S1** Stress-strain curves of the Celgard membrane.

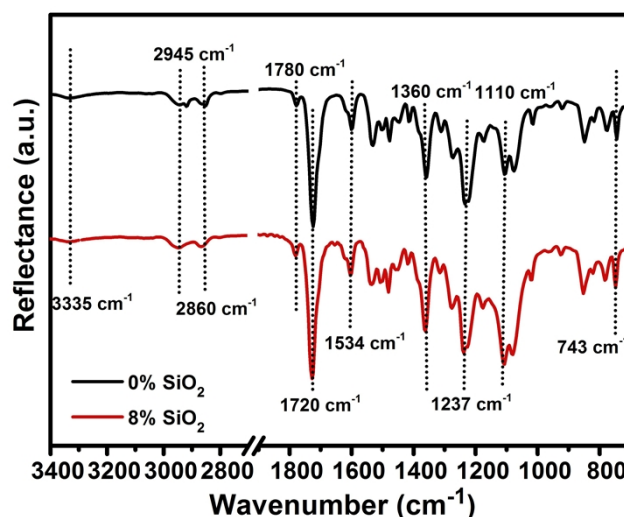

**Fig. S2** FT-IR spectra of SiO<sub>2</sub>-PEI-PU nanofibrous membranes.

The FT-IR spectra of the SiO<sub>2</sub>-PEI-PU nanofibrous membranes are shown in Fig. S2. The absorption spectra exhibit characteristic imide group absorptions at 1780 and 1720 cm<sup>-1</sup> (asymmetrical and symmetrical stretching of imide carbonyl bond), 1360 and 743 cm<sup>-1</sup> (C-N stretching and bending), and 1237 cm<sup>-1</sup> (aromatic ether C-O-C).<sup>1</sup> The typical absorption features for carbamate group were found at 3335 cm<sup>-1</sup> (hydrogen-bonded N-H stretching), 1720 cm<sup>-1</sup> (stretching vibrations of C=O), 1534 cm<sup>-1</sup> (CO-N-H bending), 1110 cm<sup>-1</sup> (C-O-C), 2945 and 2860 cm<sup>-1</sup> (asymmetrical and symmetric stretching of CH<sub>2</sub>), respectively.<sup>2</sup> Meanwhile, the increased band intensity

at  $1110\text{ cm}^{-1}$  of  $\text{SiO}_2$ -PEI-PU membranes containing 8 wt%  $\text{SiO}_2$  NPs may be ascribed to Si-O-Si stretching, which implies that the introduction of  $\text{SiO}_2$  NPs.

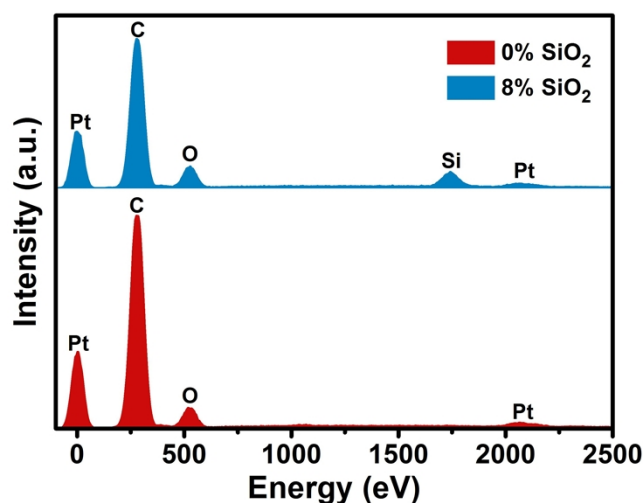

**Fig. S3** EDX spectra of  $\text{SiO}_2$ -PEI-PU nanofibrous membranes.

Further confirmation of the involvement of  $\text{SiO}_2$  NPs has done by the energy-dispersive X-ray spectroscopy (EDX). Fig. S3 shows the typical EDX pattern for PEI-PU and  $\text{SiO}_2$ -PEI-PU nanofibrous membranes. Note that Pt signals come from the sputter-coating gold film. The EDX pattern for the  $\text{SiO}_2$ -PEI-PU membranes containing 0 wt%  $\text{SiO}_2$  NPs do not show the characteristic signal of Si, whereas for the  $\text{SiO}_2$ -PEI-PU nanofibrous membranes containing 8 wt%  $\text{SiO}_2$  NPs a clear signal of the presence of Si has been observed. All of these indicate that the successful introduction of  $\text{SiO}_2$  NPs in the  $\text{SiO}_2$ -PEI-PU membranes.

## References

1. A. Choudhury, *Mater. Chem. Phys.*, 2010, **121**, 280.
2. J. Wang, Y. Li, H. Tian, J. Sheng, J. Yu and B. Ding, *RSC Adv.*, 2014, **4**, 61068.
